# Supplementary material
Source: PubMed Central journal article supplement (PMC5118034)
Supplement: NIHMS799827-supplement-Supplementary_Figure_2.pdf [file NIHMS799827-supplement-Supplementary_Figure_2.pdf]

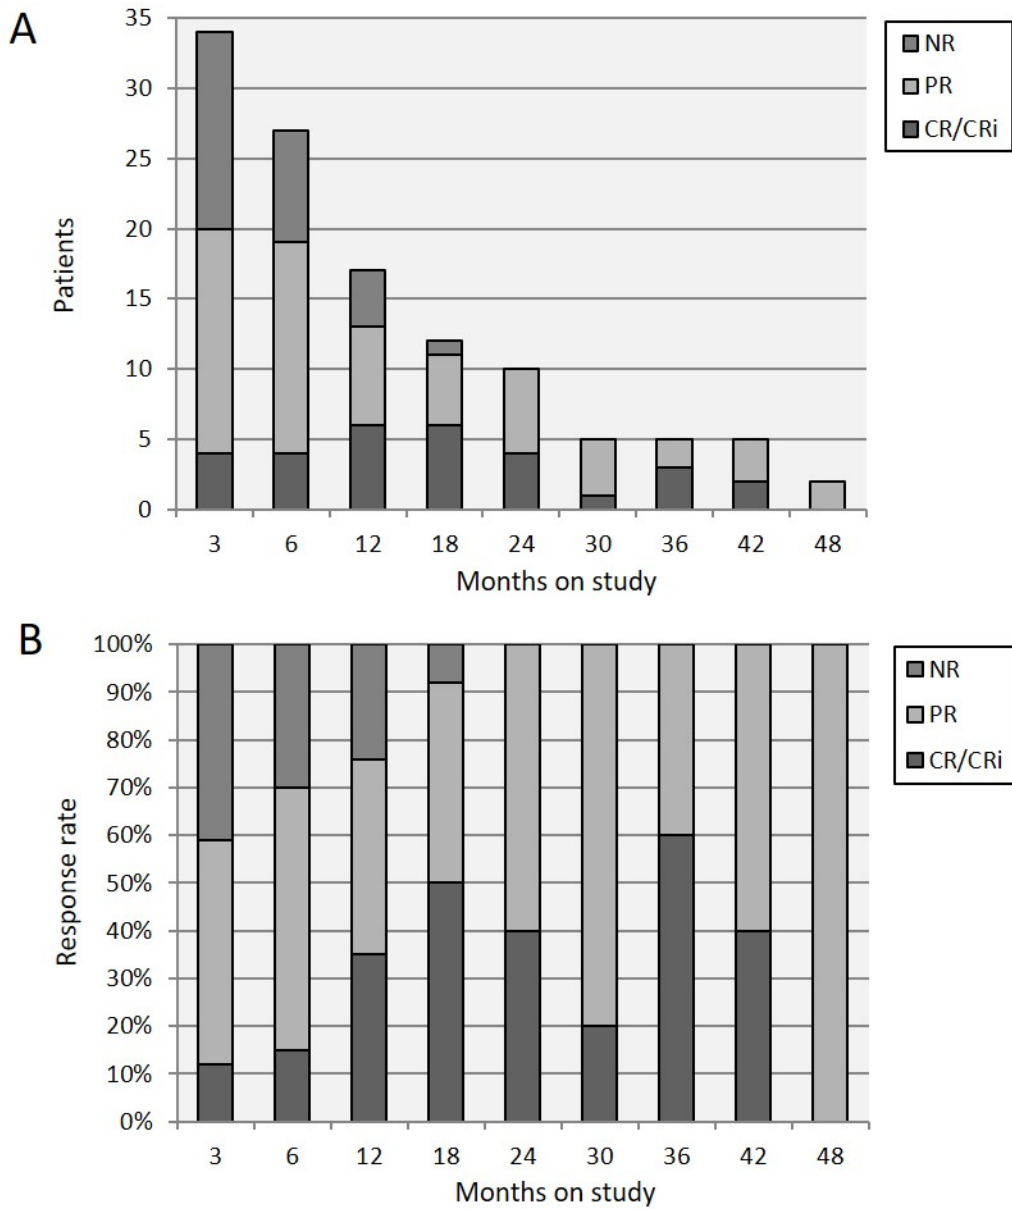

**Supplementary Figure 2. Absolute number of responses and response rates in evaluable patients over time.** Each column represents the number (A) or proportion (B) of responses at corresponding time points of the study follow-up period.
