# Supplementary material
Source: PubMed Central journal article supplement (PMC5118034)
Supplement: NIHMS799827-supplement-Supplementary_Figure_4.pdf [file NIHMS799827-supplement-Supplementary_Figure_4.pdf]

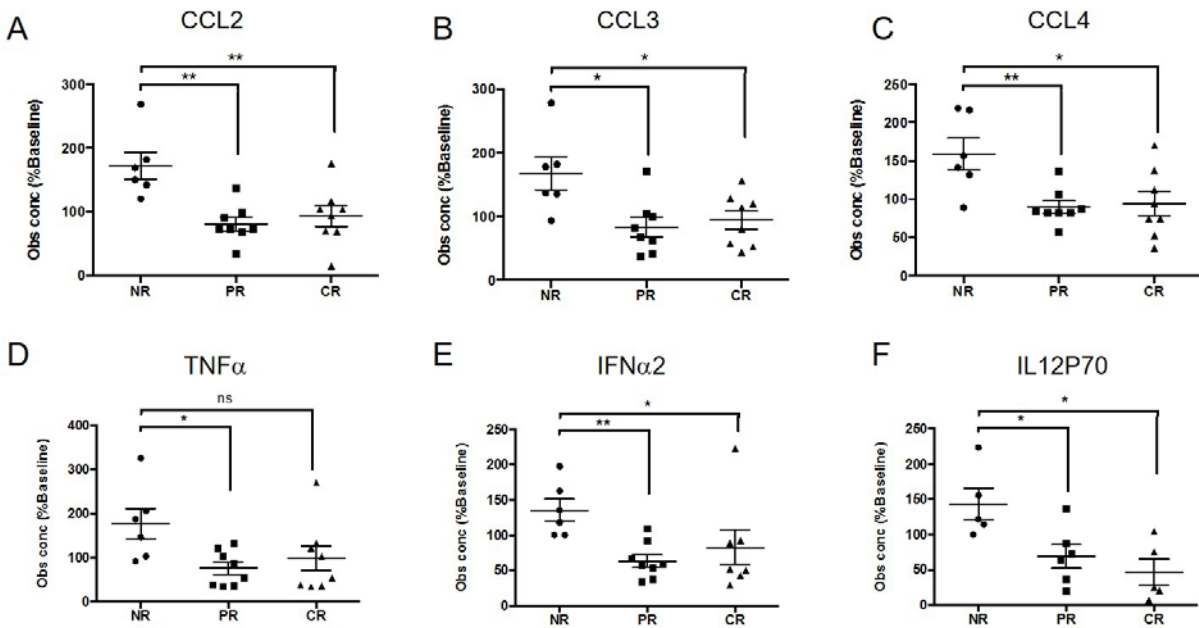

**Supplementary Figure 4. Plasma chemokine and cytokine modulation during ofatumumab and lenalidomide treatment.** CCL2 (A), CCL3 (B), CCL4 (C), TNF $\alpha$  (D), IFN $\alpha$ 2 (E), and IL-12p70 (F) plasma levels were measured before the treatment and at the beginning of course 3. Dots represent concentrations at course 3 as a percentage of the baseline level for each patient. Mean  $\pm$ SEM for each group of patients is shown. Non responders (NR) show increased chemokine/cytokine levels following therapy as compared to partial responders (PR) or complete responders (CR). \*p<0.05; \*\*p<0.01.
